# Supplementary material
Source: Springer Nature journal article supplement (https://www.springermedizin.de/resource/supplementary/12874_2008_401_MOESM1_ESM.pdf/9434398)

### Colon data

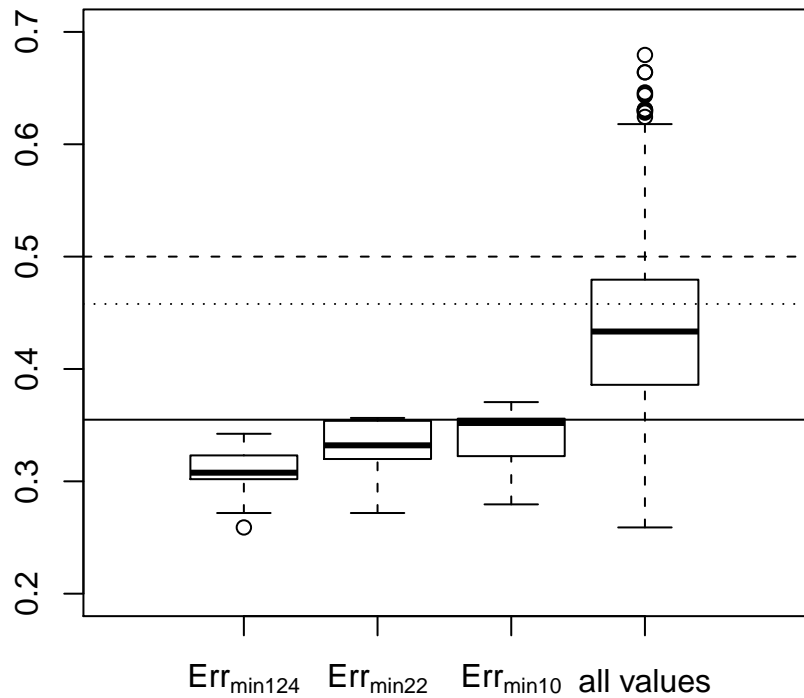

### Prostate data

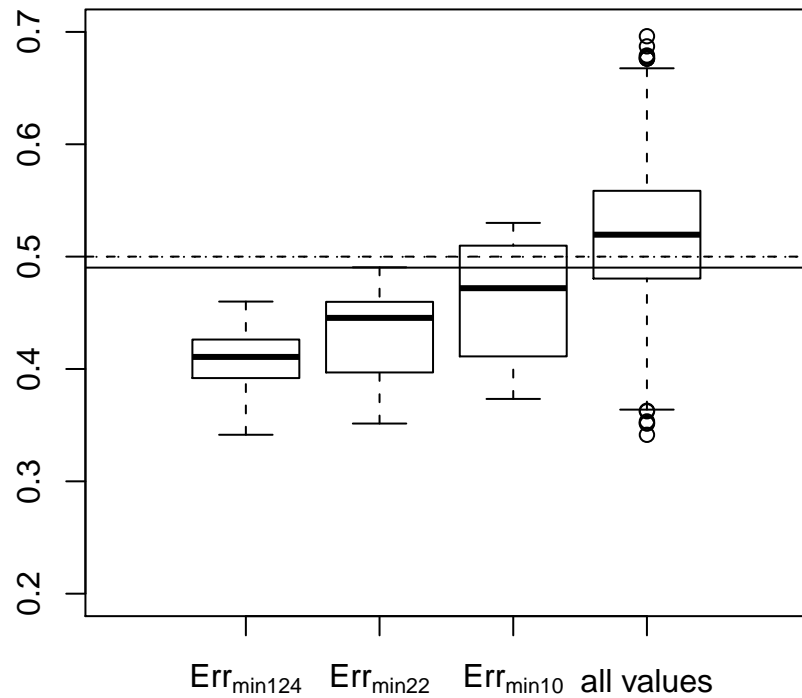

Supplement: MOESM1 [file 9434398]
